# Supplementary material for: Low levels of IGFBP7 expression in high-grade serous ovarian carcinoma is associated with patient outcome
Source: BMC Cancer. 2015 Mar 17;15:135. doi: 10.1186/s12885-015-1138-8 (PMC4381406; doi:10.1186/s12885-015-1138-8)
Supplement: Additional file 1: — Primers used in RT-PCR and sequencing assays. [file 12885_2015_1138_MOESM1_ESM.xls]

## Sheet: Sheet1
Additional File 1. Primers used in RT-PCR, sequencing and methylation assays.
Gene or marker	Forward	Reverse	Assay
IGFBP7 (3'UTR)	TGCCGAGCTATAAACCTCCA	TTTGTATTTCTCTGTGTAAAACCAGTG	RT-PCR
IGFBP7 (coding region)	AGCTGTGAGGTCATCGGAAT	TATAGCTCGGCACCTTCACC	RT-PCR
18S	TGAGGCCATGATTAAGAGGG	CGCTGAGCCAGTCAGTGTAG	RT-PCR
IGFBP7 (exon 1)	CAAGAGGCGGAAGGGTAAAG	GGGAATCGCAGTGAGCAG	Sequencing
IGFBP7 (exon 2)	AGGAAGCCAGTGTGGTCTTTG	CAGTCAACAAAGCAGGCTGAG	Sequencing
IGFBP7 (exon 3)	TGTGCAATTGTAGGGATGTGG	CAGATGTGGAAGAGCAAGCAC	Sequencing
IGFBP7 (exon 4)	TCACAGGACTTGCACTGCTTC	GATGTTCAGTCACCCATCCAG	Sequencing
IGFBP7 methylated	GGGTCGGTTACGTCGGGTGTTC	GACAAAAACGCGAATAAACCG	Methylation-Specific PCR
IGFBB7 unmethylated	ATGGGTTGGTTATGTTGGGTGTTT	CAACAACAAAAACACAAATAAACCA	Methylation-Specific PCR
