# Supplementary material for: Low levels of IGFBP7 expression in high-grade serous ovarian carcinoma is associated with patient outcome
Source: BMC Cancer. 2015 Mar 17;15:135. doi: 10.1186/s12885-015-1138-8 (PMC4381406; doi:10.1186/s12885-015-1138-8)
Supplement: Additional file 2: — Antibodies used in western blot and immunocytochemistry analyses. [file 12885_2015_1138_MOESM2_ESM.xls]

## Sheet: Sheet1
Additional File 2: Antibodies used in western blot and immunocytochemistry analyses
	Description	Species	Company	Dilution Western blot	Dilution TMA
Primary Antibodies	Anti-IGFBP7 Prestige HPA002196	Rabbit	Sigma-Aldrich	n/a	1/100
	Anti-IGFBP7	Goat	R&D Research	1/500	n/a
	Anti-phospho ERK (E-4)	Mouse	Santa Cruz	1/500	n/a
	Anti-p44 p42 MAPK (ERK1/2)	Rabbit	Cell Signaling Technology	1/500	n/a
	Anti-phospho AKT (Ser473)	Rabbit	Cell Signaling Technology	1/500	n/a
	Anti-AKT	Rabbit	Cell Signaling Technology	1/500	n/a
	Anti-Alpha-Tubulin	Rabbit	Cell Signaling Technology	1/1000	n/a
Secondary antibodies	HRP-conjugated anti-rabbit IgG	Goat	Cell Signaling Technology	1/2000	n/a
	HRP-conjugated anti-mouse immunoglobulins	Goat	DakoCytomation	1/1000	n/a
	HRP-conjugated anti-Goat IgG	Donkey	Santa Cruz	1/5000	n/a
n/a: not applicable
