# Supplementary material for: Low levels of IGFBP7 expression in high-grade serous ovarian carcinoma is associated with patient outcome
Source: BMC Cancer. 2015 Mar 17;15:135. doi: 10.1186/s12885-015-1138-8 (PMC4381406; doi:10.1186/s12885-015-1138-8)
Supplement: Additional file 4: — Features of ovarian tumour samples used in U133A Affymetrix gene chip and RT-PCR analyses. [file 12885_2015_1138_MOESM4_ESM.xls]

## Sheet: Sheet1
Additional file 4: Description of high grade serous carcinoma cohort used in tissue microarray
IGFBP7 staining intensity	Number of cases	Stage	Age (years)	Mean Overall Survival (months)	Median overall survival (months)
Negative	17	3	66	28.1	18.5
Low and moderate	144	3	62	33.4	29
High	14	3	61	42.9	41
