# Supplementary material for: Low levels of IGFBP7 expression in high-grade serous ovarian carcinoma is associated with patient outcome
Source: Springer Nature journal article supplement (doi:10.1186/s12885-015-1138-8), 2015-03-16

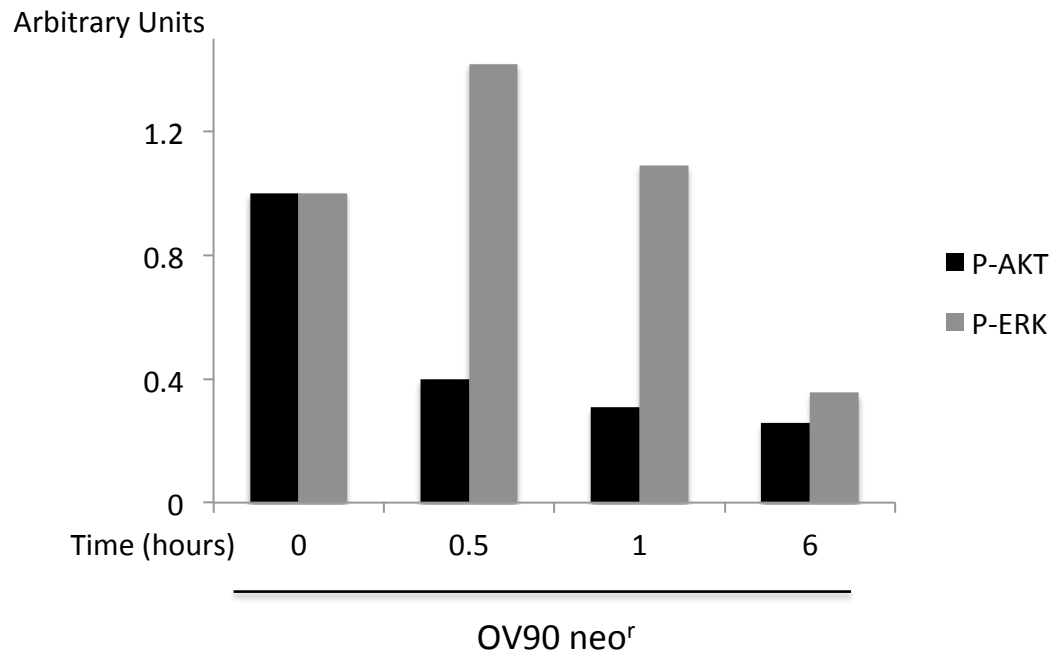

Supplement: MOESM7 [file 9744064]
